# Supplementary material
Source: publisher figshare collection journal article supplement (https://gsajournals.figshare.com/ndownloader/files/14601854)
Supplement: Supplementary file 1 [file 14601854]

## Sheet: Sheet1
Table S2 Verification of Homer motifs using MEME.
Homer motif #	Match E-value	MEME consensus	MEME E-value	Motif Alignment
1	3.2e-14	AAAAAAAAA	8.2e-295	AAAAAAAAAAAA
				AAAAAAAAA---
2	1.5e-08	GGGGGGGG	4.9e-12	RRRGGGGGGGRR
				--GGGGGGGG--
3	0.0005	RARRRAAA	4.7e-32	GAGAGAGAGAKA
				----RARRRAAA
4	0.00037	CMAACTCC	3.8e-06	CCARTNNY
				CMAACTCC
5	1.8e-08	AWAAATATA	8.3e-08	NAYATANATR
				-AWAAATATA
6	0.0035	AGCWGAAG	0.00048	AGRTTAAN
				AGCWGAAG
7	1.2e-05	AAATGAAA	6.3e-17	KAAAGAAAGC
				AAATGAAA--
8	-	-	-	-
9	0.011	AAATGAAA	6.3e-17	-YANGNACY
				AAATGAAA-
10	2.8e-06	AAAAATTCAA	0.032	AANAATTSRG
				AAAAATTCAA
11	0.00048	GATTCCAG	0.091	-AGTCCANG
				GATTCCAG-
12	0.0027	AAATAATAA	6.3e-18	--ATNATNAT
				AAATAATAA-
13	0.0029	AAATAATAA	6.3e-18	GTACATACTN-
				--AAATAATAA
